# Supplementary material
Source: PubMed Central journal article supplement (PMC2292606)
Supplement: aem_74_7_2218__1.pdf [file aem_74_7_2218__1.pdf]

**Table S1:** *Methylobacterium* sequences with mismatches to the specific primers. Analysis included 326 quality-controlled sequences of cultivated and uncultivated *Methylobacterium* strains present in the SILVA SSU Ref database, release 92.

| Accession number                    | Name                                 | No of mismatches         |
|-------------------------------------|--------------------------------------|--------------------------|
| <b>Primer 1319fGC20<sup>1</sup></b> |                                      |                          |
| AY177363                            | Phenanthrene-degrading bacterium     | 1                        |
| AY177358                            | Phenanthrene-degrading bacterium     | 1 (= AY177363)           |
| AB220083                            | <i>M. sp.</i> PB133                  | 1 (= AY177363)           |
| AB114610                            | Uncultured bacterium                 | 1                        |
| AM691114                            | Uncultured bacterium                 | 1                        |
| DQ490352                            | <i>M. sp.</i> KVD-1921-03            | 1                        |
| D32235                              | <i>M. sp.</i> F42                    | 1                        |
| AY328673                            | Uncultured bacterium                 | 3                        |
| AY568504                            | <i>M. sp.</i> C-14                   | 4                        |
| AY828572                            | <i>M. sp.</i> P4E                    | 1 insertion              |
| EF138946                            | <i>M. sp.</i> LR-2006a               | 1 insertion              |
| <b>Primer 444lof</b>                |                                      |                          |
| DQ490353                            | <i>M. sp.</i> KVD-1894-12            | 1                        |
| DQ490345                            | <i>M. sp.</i> KVD-unk-23             | 1 (= DQ490353)           |
| DQ490346                            | <i>M. sp.</i> KVD-unk-41             | 1 (= DQ490353)           |
| DQ870729                            | <i>M. sp.</i> JSCtot8-4              | 1                        |
| EF098942                            | Uncultured bacterium                 | 1                        |
| AY568504                            | <i>M. sp.</i> C-14                   | 1                        |
| DQ223682                            | <i>M. sp.</i> zf-IVRHt11             | 1                        |
| M95655                              | <i>M. sp.</i>                        | 1                        |
| AF395030                            | <i>M. sp.</i> TD4                    | 1                        |
| AM697501                            | Uncultured bacterium                 | 1                        |
| DQ223681                            | <i>M. sp.</i> zf-IVRHt8              | 2                        |
| AM234164                            | <i>Alphaproteobacterium</i> S15-IsoA | 3 insertions, 1 deletion |

<sup>1</sup> analysis was done without GC-clamp

**Table S2:** Organisms containing 16S rRNA gene sequences with zero mismatches to the specific primers. Analysis was performed in October 2007 using the probe match tool of the ribosomal database project II. Good quality sequences of  $\geq 1200$  bp were included in the analysis. Number of available sequences for each taxon is given in brackets.

| Phylum                              | Class                                                | Order                                         | Family                            | Genus                                | No of targets |
|-------------------------------------|------------------------------------------------------|-----------------------------------------------|-----------------------------------|--------------------------------------|---------------|
| <b>Primer 1319fGC20<sup>1</sup></b> |                                                      |                                               |                                   |                                      | <b>463</b>    |
| <i>Actinobacteria</i>               | <i>Actinobacteria</i><br>( <i>Actinobacteridae</i> ) | <i>Actinomycetales</i>                        | Unclassified (626)                |                                      | 1             |
| OP10                                | OP10_genera_incertae_sedis (74)                      |                                               |                                   |                                      | 1             |
| <i>Proteobacteria</i>               | <i>Alphaproteobacteria</i>                           | <i>Rhodospirillales</i>                       | <i>Rhodospirillaceae</i>          | Unclassified (26)                    | 2             |
|                                     |                                                      |                                               | <i>Acetobacteriaceae</i>          | <i>Acidisphaera</i> (21)             | 1             |
|                                     |                                                      |                                               |                                   | <i>Acidicaldus</i> (19)              | 19            |
|                                     |                                                      |                                               |                                   | Unclassified (110)                   | 7             |
|                                     |                                                      |                                               | Unclassified (198)                |                                      | 3             |
|                                     |                                                      | <i>Sphingomonadales</i>                       | <i>Sphingomonadaceae</i>          | <i>Sphingomonas</i> (475)            | 40            |
|                                     |                                                      |                                               |                                   | <i>Novosphingobium</i> (235)         | 4             |
|                                     |                                                      |                                               |                                   | <i>Sandaracinobacter</i> (6)         | 4             |
|                                     |                                                      |                                               |                                   | <i>Sphingobium</i> (235)             | 1             |
|                                     |                                                      |                                               |                                   | Unclassified (125)                   | 5             |
|                                     |                                                      | <i>Rhizobiales</i>                            | <i>Methylocystaceae</i>           | Unclassified (20)                    | 1             |
|                                     |                                                      |                                               | <i>Beijerinckiaceae</i>           | <i>Chelatococcus</i> (7)             | 4             |
|                                     |                                                      |                                               |                                   | Unclassified (25)                    | 1             |
|                                     |                                                      |                                               | <i>Bradyrhizobiaceae</i>          | <i>Balneimonas</i> (6)               | 6             |
|                                     |                                                      |                                               | <b><i>Methylobacteriaceae</i></b> | <b><i>Methylobacterium</i> (340)</b> | <b>324</b>    |
|                                     |                                                      |                                               |                                   | Unclassified (1)                     | 1             |
|                                     |                                                      |                                               | Unclassified (672)                |                                      | 24            |
|                                     |                                                      | Unclassified (1269)                           |                                   |                                      | 6             |
|                                     | <i>Deltaproteobacteria</i>                           | <i>Myxococcales</i><br>( <i>Sorangineae</i> ) | <i>Polyangiaceae</i>              | <i>Byssovorax</i> (60)               | 1             |
|                                     | <i>Epsilonproteobacteria</i>                         | <i>Campylobacterales</i>                      | <i>Helicobacteraceae</i>          | <i>Sulfurovum</i> (419)              | 1             |
|                                     |                                                      | <i>Nautiliales</i>                            | <i>Nautiliaceae</i>               | <i>Nautilia</i> (4)                  | 3             |
|                                     |                                                      |                                               |                                   | <i>Lebetimonas</i> (2)               | 1             |
|                                     |                                                      |                                               |                                   | Unclassified (4)                     | 2             |
| <b>Primer 444lof</b>                |                                                      |                                               |                                   |                                      | <b>424</b>    |
| <i>Acidobacteria</i>                | <i>Acidobacteria</i>                                 | <i>Acidobacteriales</i>                       | <i>Acidobacteriaceae</i>          | Genus Gp1 (519)                      | 69            |
| <i>Proteobacteria</i>               | <i>Alphaproteobacteria</i>                           | <i>Rhizobiales</i>                            | <i>Beijerinckiaceae</i>           | <i>Chelatococcus</i> (7)             | 6             |
|                                     |                                                      |                                               | <i>Bradyrhizobiaceae</i>          | <i>Balneimonas</i> (6)               | 3             |
|                                     |                                                      |                                               |                                   | Unclassified (90)                    | 1             |
|                                     |                                                      |                                               | <b><i>Methylobacteriaceae</i></b> | <b><i>Methylobacterium</i> (340)</b> | <b>326</b>    |
|                                     |                                                      |                                               |                                   | <i>Microvirga</i> (6)                | 2             |
|                                     |                                                      |                                               | Unclassified (672)                |                                      | 14            |
|                                     |                                                      | Unclassified (1269)                           |                                   |                                      | 2             |
| Unclassified bacteria (3652)        |                                                      |                                               |                                   |                                      | 1             |

<sup>1</sup> analysis was done without GC-clamp
